# Supplementary material
Source: PubMed Central journal article supplement (PMC6152342)
Supplement: DB180462SupplementaryData.pdf [file DB180462SupplementaryData.pdf]

SUPPLEMENTARY DATA

**Supplementary Figure 1.** Each of the 12 subjects with detectable cold-activated BAT glucose uptake (left) were treated in random order with acute, one-time doses of placebo, 50 mg, and 200 mg mirabegron. Of note, subject #4 was unable to complete the study and did not receive the placebo dose.

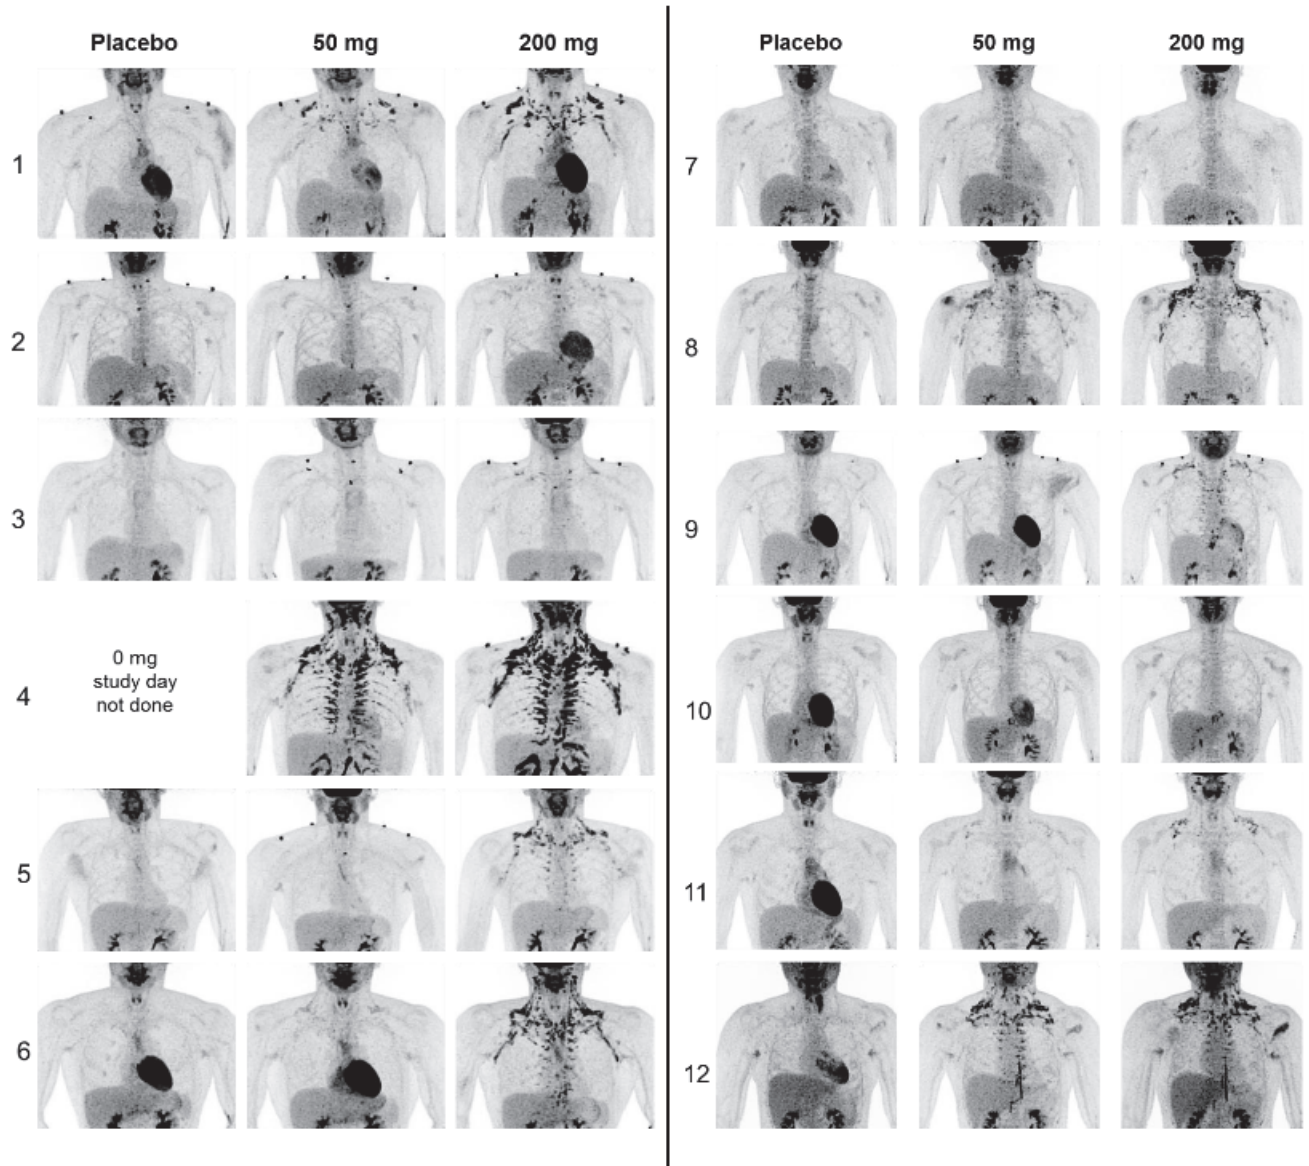

SUPPLEMENTARY DATA

**Supplementary Figure 2. Vital Signs in Response to Mirabegron Treatment.** (A) Changes in heart rate (HR), systolic blood pressure (SBP), and diastolic blood pressure (DBP) before and 5 hours after treatment with placebo, 50 mg, and 200 mg in 12 healthy male subjects. P values were determined by paired Student's *t*-test. (B) Dose-dependent changes in HR, SBP, and DBP. P values were determined by simple linear regression with the 12 subjects treated as random effects variables.

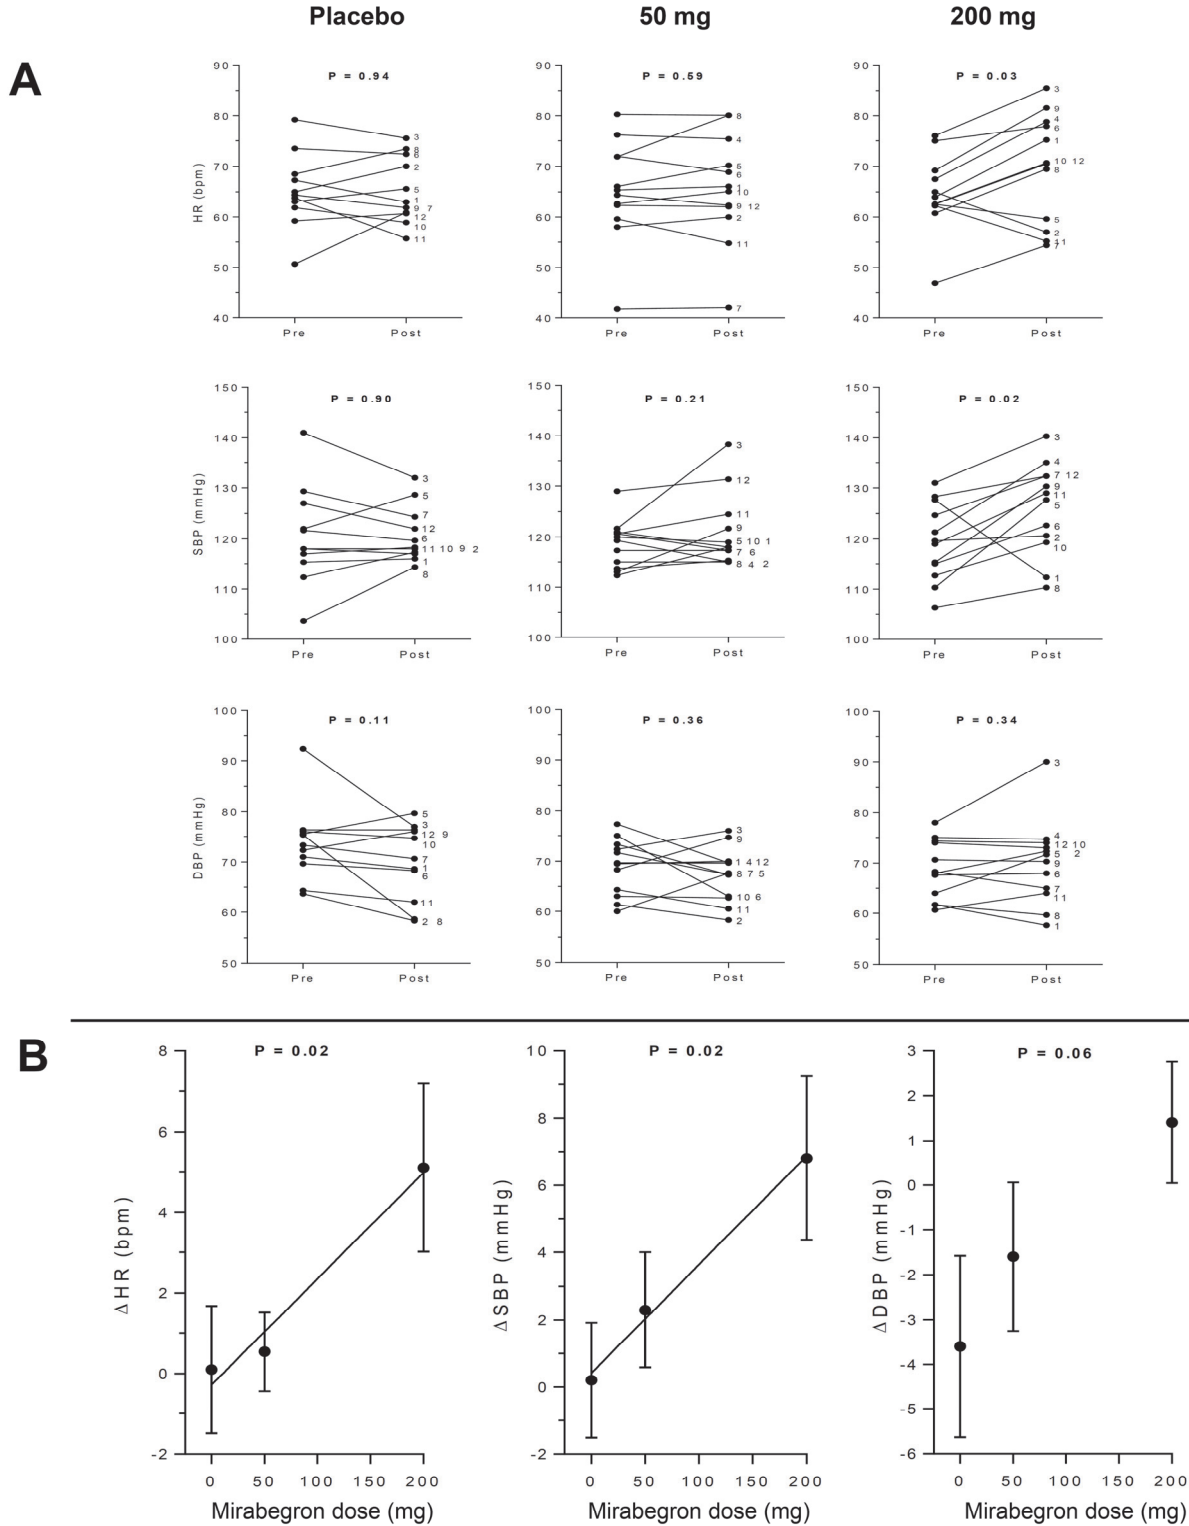

SUPPLEMENTARY DATA

**Supplementary Table 1. PCR Information**

**Primer sequences used in quantitative RT-PCR for mouse tissue**

| <b>Gene</b>  | <b>Sequence</b> |                             |
|--------------|-----------------|-----------------------------|
| <i>Actb</i>  | Forward         | GGC ACC ACA CCT TCT ACA ATG |
|              | Reverse         | GGG GTG TTG AAG GTC TCA AAC |
| <i>Adrb3</i> | Forward         | CCAGCCAGCCCTGTTGA           |
|              | Reverse         | GGACGCGCACCTTCATAGC         |
| <i>Ucp1</i>  | Forward         | CACCTTCCCGCTGGACACT         |
|              | Reverse         | CCCTAGGACACCTTTATACCTAATGG  |

**TaqMan Primer sequences used in quantitative RT-PCR for human tissue**

| <b>Gene</b>  | <b>Assay ID</b> | <b>Reference Sequence</b> |
|--------------|-----------------|---------------------------|
| <i>ACTB</i>  | Hs99999903_m1   | NM_001101.3               |
| <i>ADRB3</i> | Hs00609046_m1   | NM_000025.2               |
| <i>UCP1</i>  | Hs00222453_m1   | NM_021833.4               |

SUPPLEMENTARY DATA

**Supplementary Table 2. Mirabegron Pharmacokinetic Parameters**

| Pharmacokinetic Measure (Units)                                                                                                                                                                           | 50 mg         | 200 mg          |
|-----------------------------------------------------------------------------------------------------------------------------------------------------------------------------------------------------------|---------------|-----------------|
| $C_{max}^a$ (ng*mL <sup>-1</sup> )                                                                                                                                                                        | 21.7 ± 13.4   | 142.6 ± 65.1    |
| $t_{max}^b$ (min)                                                                                                                                                                                         | 240 (180-360) | 180 (120-300)   |
| AUC <sub>0-300</sub> <sup>c</sup> (ng*h*mL <sup>-1</sup> )                                                                                                                                                | 215.6 ± 109.2 | 1,633.5 ± 591.2 |
| AUC <sub>240-300</sub> <sup>d</sup> (ng*h*mL <sup>-1</sup> )                                                                                                                                              | 12.7 ± 6.2    | 70.2 ± 34.1     |
| <sup>a</sup> Mean ± SD;<br><sup>b</sup> Median (Range);<br><sup>c</sup> AUC from time of administration to PET/CT scan reported as Mean ± SD;<br><sup>d</sup> AUC during FDG uptake reported as Mean ± SD |               |                 |

SUPPLEMENTARY DATA

**Supplementary Table 3. Predictors of BAT Metabolic Activity**

| Criterion    | Predictor       | P Value | $\beta$ |
|--------------|-----------------|---------|---------|
| BAT Activity | Dose            | 0.002   | 1.99    |
|              | $C_{\max}$      | 0.010   | 2.02    |
|              | $AUC_{0-300}$   | 0.007   | 0.19    |
|              | $AUC_{240-300}$ | 0.015   | 3.92    |

Simple linear regression with random effects = Subject [Sequence],  $n = 35$

SUPPLEMENTARY DATA

**Supplementary Table 4. Mirabegron C<sub>max</sub>, AUC<sub>240-300</sub>, and BAT Activity**

| Subject             | C <sub>max</sub> (ng/mL) |                  |                    | AUC <sub>240-300</sub> (ng*h/mL) |                   |                    | BAT Activity (mL*SUVmean*g/mL) |                  |                    |
|---------------------|--------------------------|------------------|--------------------|----------------------------------|-------------------|--------------------|--------------------------------|------------------|--------------------|
|                     | Placebo                  | 50 mg            | 200 mg             | Placebo                          | 50 mg             | 200 mg             | Placebo                        | 50 mg            | 200 mg             |
| 1                   | 0.0                      | 18.3             | 154.4              | 0.0                              | 12.2              | 77.1               | 0.0                            | 32.3             | 377.2              |
| 2                   | 0.0                      | 5.8              | 162.1              | 0.0                              | 3.2               | 52.1               | 0.0                            | 0.0              | 138.3              |
| 3                   | 0.0                      | 43.7             | 150.8              | 0.0                              | 28.2              | 109.2              | 0.0                            | 4.2              | 69.8               |
| 4                   | n/a                      | 20.6             | 111.8              | n/a                              | 10.7              | 57.4               | n/a                            | 1529.5           | 3310.7             |
| 5                   | 0.0                      | 11.4             | 106.4              | 0.0                              | 7.8               | 64.9               | 0.0                            | 0.1              | 272.7              |
| 6                   | 0.0                      | 15.6             | 68.7               | 0.0                              | 9.3               | 26.9               | 0.0                            | 125.9            | 803.1              |
| 7                   | 0.0                      | 20.3             | 48.5               | 0.0                              | 16.3              | 27.9               | 0.3                            | 1.4              | 0.0                |
| 8                   | 0.0                      | 14.3             | 89.7               | 0.0                              | 13.9              | 66.4               | 0.0                            | 303.7            | 661.3              |
| 9                   | 0.0                      | 16.7             | 263.5              | 0.0                              | 13.1              | 100.0              | 0.0                            | 0.0              | 338.4              |
| 10                  | 0.0                      | 27.4             | 119.8              | 0.0                              | 8.6               | 63.8               | 0.0                            | 0.0              | 26.6               |
| 11                  | 0.0                      | 14.7             | 209.0              | 0.0                              | 13.7              | 145.8              | 0.0                            | 42.7             | 165.0              |
| 12                  | 0.0                      | 52.0             | 227.0              | 0.0                              | 16.0              | 50.5               | 0.7                            | 543.7            | 488.2              |
| <b>Mean ± SD</b>    | 0.0 ± 0.0                | 21.7 ± 13.4      | 142.6 ± 65.1       | 0.0 ± 0.0                        | 12.7 ± 6.2        | 70.2 ± 34.1        | 0.1 ± 0.2                      | 215.3 ± 446.2    | 554.3 ± 903.4      |
| <b>Median (IQR)</b> | 0.0 (0.0-0.0)            | 17.5 (14.4-25.7) | 135.3 (93.9-197.3) | 0.0 (0.0-0.0)                    | 12.7 (9.1 – 14.4) | 64.4 (51.7 – 82.8) | 0.0 (0.0-0.3)                  | 18.3 (0.0-259.2) | 305.6 (86.9-618.0) |

SUPPLEMENTARY DATA

**Supplementary Table 5. Blood Levels of Common Metabolites and Hormones**

| Metabolite (units)     | Baseline <sup>A</sup> | Δ Placebo <sup>B</sup>    | Δ 50 mg                   | Δ 200 mg                   |
|------------------------|-----------------------|---------------------------|---------------------------|----------------------------|
| Glucose (mg/dL)        | 88 ± 7                | -4 ± 6                    | -4 <sup>C</sup> ± 6       | -4 ± 10                    |
| Insulin (μU/mL)        | 6.4 ± 2.7             | -2.6 <sup>C</sup> ± 1.8   | -0.8 ± 2.5                | -1.1 ± 4.4                 |
| 3-hydroxybutyrate (mM) | 0.14 ± 0.07           | 0.04 ± 0.07               | 0.08 <sup>D</sup> ± 0.07  | 0.08 <sup>C</sup> ± 0.10   |
| Lactate (mmol/L)       | 0.9 ± 0.3             | 0.1 ± 0.1                 | 0.1 ± 0.2                 | 0.1 ± 0.5                  |
| Pyruvate (mg/dL)       | 0.8 ± 0.2             | -0.1 ± 0.1                | 0.0 ± 0.2                 | 0.0 ± 0.2                  |
| Glycerol (mg/mL)       | 7.74 ± 3.14           | -1.37 ± 2.94              | 1.57 <sup>F</sup> ± 3.75  | 0.14 ± 5.33                |
| NEFA (mEq/L)           | 0.41 ± 0.15           | 0.06 ± 0.20               | 0.23 <sup>C</sup> ± 0.29  | 0.28 <sup>D,F</sup> ± 0.21 |
| Total bile acids (μM)  | 4.56 ± 3.02           | -3.32 <sup>D</sup> ± 3.21 | -2.02 <sup>D</sup> ± 1.64 | -3.29 <sup>E</sup> ± 2.12  |
| C4 <sup>G</sup> (μM)   | 12.3 ± 11.8           | -0.7 ± 10.3               | -3.5 ± 14.3               | 0.5 ± 10.9                 |
| Norepinephrine (pg/mL) | 339 ± 94              | 54 ± 94                   | 17 ± 49                   | 0 ± 120                    |
| Epinephrine (pg/mL)    | 22 ± 13               | 3 ± 15                    | -2 ± 13                   | 4 ± 9                      |
| Dopamine (pg/mL)       | 36 ± 59               | 3 ± 11                    | -50 ± 174                 | -1 ± 4                     |
| T3, total (ng/dL)      | 116.0 ± 12.7          | -0.7 ± 4.9                | 0.1 ± 9.1                 | -1.1 ± 10.5                |
| T4, free (ng/dL)       | 1.3 ± 0.1             | 0.0 <sup>C</sup> ± 0.1    | 0.1 <sup>C</sup> ± 0.08   | 0.0 ± 0.1                  |
| TSH (μIU/mL)           | 2.31 ± 1.11           | -0.62 <sup>D</sup> ± 0.71 | -0.50 <sup>D</sup> ± 0.36 | -0.77 ± 0.59               |
| PTH (pg/mL)            | 33.2 ± 8.9            | 5.1 ± 9.0                 | 3.2 ± 6.4                 | 2.9 ± 6.9                  |
| Cortisol (μg/dL)       | 14.3 ± 3.0            | -6.3 <sup>C</sup> ± 3.9   | -6.6 <sup>D</sup> ± 4.7   | -6.6 <sup>E</sup> ± 4.6    |
| Growth Hormone (ng/mL) | 0.44 ± 0.88           | 2.71 <sup>C</sup> ± 3.4   | -0.23 ± 2.86              | 0.32 ± 1.13                |
| Glucagon (pmol/L)      | 6.67 ± 1.95           | -2.10 ± 3.33              | -0.75 ± 2.51              | -1.67 ± 3.02               |
| ACTH (pg/mL)           | 32.1 ± 17.2           | -15.2 <sup>C</sup> ± 19.9 | -11.9 <sup>B</sup> ± 12.3 | -16.4 <sup>C</sup> ± 23.3  |
| Leptin (pg/mL)         | 1102 ± 710            | -311 <sup>D</sup> ± 223   | -444 <sup>D</sup> ± 374   | -367 <sup>D</sup> ± 309    |
| Adiponectin (ng/mL)    | 4473 ± 1672           | 92 ± 279                  | -178 ± 374                | 95 ± 288                   |
| Ghrelin (pg/mL)        | 37.9 ± 37.6           | 5.2 ± 27.6                | 20.3 ± 42.5               | 0.6 ± 40.4                 |
| GIP (pg/mL)            | 58.8 ± 28.7           | -13.6 ± 45.2              | -23.0 <sup>D</sup> ± 19.9 | -29.0 <sup>D</sup> ± 23.5  |
| PYY (pg/mL)            | 74.3 ± 29.5           | -3.7 ± 28.23              | -11.4 <sup>D</sup> ± 12.4 | -9.9 ± 17.2                |
| GLP-1 (pg/mL)          | 2.06 ± 1.02           | -1.71 <sup>C</sup> ± 1.85 | -0.91 <sup>D</sup> ± 0.80 | -1.35 <sup>E</sup> ± 0.87  |
| FGF19 (pg/mL)          | 197 ± 112             | -118 <sup>D</sup> ± 110   | -88 <sup>C</sup> ± 112    | -102 <sup>E</sup> ± 81     |
| FGF21 (ng/mL)          | 99.8 ± 67.0           | -52.5 <sup>C</sup> ± 65.0 | -41.4 <sup>D</sup> ± 41.8 | -27.8 <sup>D</sup> ± 28.4  |
| Total Protein (g/dL)   | 7.1 ± 0.2             | 0.2 ± 0.4                 | 0.2 <sup>C</sup> ± 0.3    | 0.2 ± 0.4                  |
| Creatine Kinase (U/L)  | 425 ± 606             | -136 ± 339                | -15 ± 22                  | -26 ± 47                   |

<sup>A</sup>Baseline values reflect an average of placebo and active drug day pre-treatment values (RM-ANOVA confirmed pre-treatment values were not statistically different across days);

<sup>B</sup>Baseline Values are means ±SD

<sup>C</sup>Difference(Δ = post-treatment –pre-treatment) values (P < 0.05), Paired t-test.

<sup>D</sup>Difference(Δ = post-treatment –pre-treatment) values(P < 0.01), Paired t-test.

<sup>E</sup>Difference(Δ = post-treatment –pre-treatment) values(P < 0.001), Paired t-test.

<sup>F</sup>Difference between changes during placebo day and changes during active drug day (P < 0.05). Paired t-test. Depicted in gray. RM-ANOVA showed a dose-dependent relationship (P = 0.05).

<sup>G</sup>7α-hydroxy-4-cholesten-3-one

SUPPLEMENTARY DATA

**Supplementary Table 6. Predictors of Cardiovascular Changes**

|                                                                                                                                                                                                              | <b>Placebo</b>            | <b>50 mg</b>               | <b>200 mg</b>                 |
|--------------------------------------------------------------------------------------------------------------------------------------------------------------------------------------------------------------|---------------------------|----------------------------|-------------------------------|
| $\Delta$ Heart Rate <sup>A</sup> (bpm)                                                                                                                                                                       | +0.1 ± 5.2<br>P = 0.94    | +0.5 ± 3.4<br>P = 0.59     | +5.1 ± 7.2<br>P = 0.03        |
| $\Delta$ Systolic BP <sup>A</sup> (mmHg)                                                                                                                                                                     | +0.2 ± 5.7<br>P = 0.90    | +2.3 ± 5.9<br>P = 0.21     | +6.8 ± 8.4<br>P = 0.02        |
| $\Delta$ Diastolic BP <sup>A</sup> (mmHg)                                                                                                                                                                    | -3.6 ± 6.7<br>P = 0.11    | -1.6 ± 5.8<br>P = 0.36     | +1.4 ± 4.7<br>P = 0.34        |
| $\Delta$ RPP <sup>A</sup> (mmHg*bpm)                                                                                                                                                                         | +29.3 ± 236.2<br>P = 0.90 | +223.3 ± 218.4<br>P = 0.33 | +1,095.1 ± 304.0<br>P = 0.004 |
| <sup>A</sup> Post (+250 min) – pre (-35 min) drug dosing, which are also the times of cold-day measurements;<br><sup>B</sup> Difference of 20-min averages (post-treatment – pre-treatment). Paired t-tests. |                           |                            |                               |



SUPPLEMENTARY DATA

**Supplementary Table 7. Predictors of Energy Expenditure**

| Criterion                              | Predictor            | $\beta$ | P Value |
|----------------------------------------|----------------------|---------|---------|
| Change in REE <sup>A</sup><br>(kcal/h) | Dose                 | 0.03    | 0.012   |
|                                        | C <sub>max</sub>     | 0.02    | 0.068   |
|                                        | AUC <sub>0-300</sub> | 0.002   | 0.046   |

<sup>A</sup>Simple linear regression, with subject within sequence as the random effects variable,  $n = 34$

| $\Delta$ REE<br>Predictors <sup>A</sup> | Simple Linear Regression |                |         | Multiple Linear Regression |                                    |         |
|-----------------------------------------|--------------------------|----------------|---------|----------------------------|------------------------------------|---------|
|                                         | $\beta$                  | R <sup>2</sup> | P Value | $\beta$                    | R <sup>2</sup> <sub>adjusted</sub> | P Value |
| $\Delta$ RPP                            | 0.0031                   | 0.45           | < 0.001 | 0.0024                     | 0.44                               | 0.003   |
| BAT Activity                            | 0.0038                   | 0.17           | 0.002   | 0.0030                     |                                    | 0.014   |
| $\Delta$ HR                             | 0.45                     | 0.12           | 0.008   | --                         | --                                 | --      |
| $\Delta$ SBP                            | 0.33                     | 0.35           | 0.009   | --                         | --                                 | --      |
| $\Delta$ DBP                            | 0.14                     | NS             | 0.399   | --                         | --                                 | --      |

<sup>A</sup>Regressions done with subject within sequence as the random effects variable,  $n = 34$

SUPPLEMENTARY DATA

**Supplementary Table 8. Means Comparisons for Mirabegron Dose and Bile Acids**

|                          |           | Cholic Acid     |         | Deoxycholic Acid |         | Glycocheno-deoxycholate |               | Glycocholic Acid     |               | Glycodeoxycholate    |                | Taurodeoxycholic acid |               |
|--------------------------|-----------|-----------------|---------|------------------|---------|-------------------------|---------------|----------------------|---------------|----------------------|----------------|-----------------------|---------------|
| Bi-variate fit with dose |           | <i>P</i> = 0.43 |         | <i>P</i> = 0.23  |         | <i>P</i> = 0.009        |               | <i>P</i> = 0.006     |               | <i>P</i> = 0.03      |                | <i>P</i> = 0.01       |               |
| Condition                | Condition | Difference      | P Value | Difference       | P Value | Difference              | P Value       | Difference           | P Value       | Difference           | P Value        | Difference            | P Value       |
| Baseline                 | Placebo   | 0.898 ± 0.293   | 0.0158  | 0.911 ± 0.298    | 0.0166  | 0.805 ± 0.226           | 0.0037        | 0.695 ± 0.249        | 0.0341        | 0.735 ± 0.235        | 0.0132         | 0.736 ± 0.260         | 0.0307        |
| Baseline                 | 50mg      | 1.170 ± 0.283   | 0.0006  | 1.193 ± 0.289    | 0.0006  | 1.548 ± 0.219           | <.0001        | 1.462 ± 0.241        | <.0001        | 1.533 ± 0.227        | <.0001         | 1.358 ± 0.252         | <.0001        |
| Baseline                 | 200mg     | 1.179 ± 0.275   | 0.0003  | 1.012 ± 0.280    | 0.0032  | 1.787 ± 0.212           | <.0001        | 1.621 ± 0.234        | <.0001        | 1.720 ± 0.220        | <.0001         | 1.565 ± 0.245         | <.0001        |
| Placebo                  | 50mg      | 0.272 ± 0.354   | 0.869   | 0.282 ± 0.361    | 0.863   | <b>0.743 ± 0.274</b>    | <b>0.0408</b> | 0.768 ± 0.302        | 0.063         | <b>0.797 ± 0.284</b> | <b>0.0323*</b> | 0.623 ± 0.316         | 0.208         |
| Placebo                  | 200mg     | 0.280 ± 0.348   | 0.851   | 0.101 ± 0.355    | 0.992   | <b>0.982 ± 0.269</b>    | <b>0.0028</b> | <b>0.926 ± 0.296</b> | <b>0.0136</b> | <b>0.985 ± 0.279</b> | <b>0.0041</b>  | <b>0.829 ± 0.310</b>  | <b>0.0448</b> |
| 50mg                     | 200mg     | 0.009 ± 0.340   | 1.000   | 0.181 ± 0.347    | 0.954   | 0.239 ± 0.263           | 0.800         | 0.159 ± 0.290        | 0.947         | 0.187 ± 0.273        | 0.902          | 0.207 ± 0.303         | 0.903         |

Shown are means comparisons reporting all pairs using Tukey-Kramer honest significant difference (HSD). Comparisons with placebo where *P* < 0.05 are shown in bold.
